# Supplementary material for: Ricinus communis L. fruit extract inhibits migration/invasion, induces apoptosis in breast cancer cells and arrests tumor progression in vivo
Source: PubMed Central journal article supplement (PMC6787038; doi:10.1038/s41598-019-50769-x), 2019-10-10
Supplement: 41598_2019_50769_MOESM1_ESM.pdf [file 41598_2019_50769_MOESM1_ESM.pdf]

## Supplementary information

### ***Ricinus communis* L. fruit extract inhibits migration/invasion, induces apoptosis in breast cancer cells and arrests tumor progression *in vivo***

Munmi Majumder<sup>1</sup>, Shibjyoti Debnath<sup>2</sup>, Rahul L. Gajbhiye<sup>3</sup>, Rimpi Saikia<sup>1</sup>, Bhaskarjyoti Gogoi<sup>4</sup>, Suman Kumar Samanta<sup>4</sup>, Deepjyoti K. Das<sup>1</sup>, Kaushik Biswas<sup>2</sup>, Parasuraman Jaisankar<sup>3</sup>, and Rupak Mukhopadhyay<sup>1\*</sup>

<sup>1</sup>Cellular, Molecular and Environmental Biotechnology Laboratory, Department of Molecular Biology and Biotechnology, Tezpur University, Tezpur 784028, Assam, India

<sup>2</sup> Division of Molecular Medicine, Bose Institute, P1/12 CIT Scheme VIIM, Kolkata 700054, India

<sup>3</sup> Laboratory of Catalysis and Chemical Biology, Organic and Medicinal Chemistry Division, CSIR-Indian Institute of Chemical Biology, Jadavpur, Kolkata 700032, India

<sup>4</sup> Institute of Advanced Study in Science and Technology, Vigyan Path, Paschim Boragaon, Guwahati, Assam 781035

#### **\*Corresponding author**

Address for communication:

**Dr. Rupak Mukhopadhyay**

Department of Molecular Biology and Biotechnology

Tezpur University

Assam 784028, India

Email: [mrupak@gmail.com](mailto:mrupak@gmail.com); [mrupak@tezu.ernet.in](mailto:mrupak@tezu.ernet.in)

Phone: +91-3712-275417 (Off)

Figure S1:

(A)

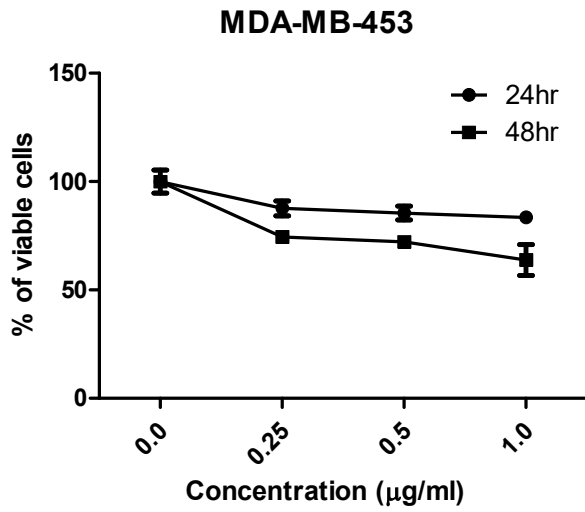

(B)

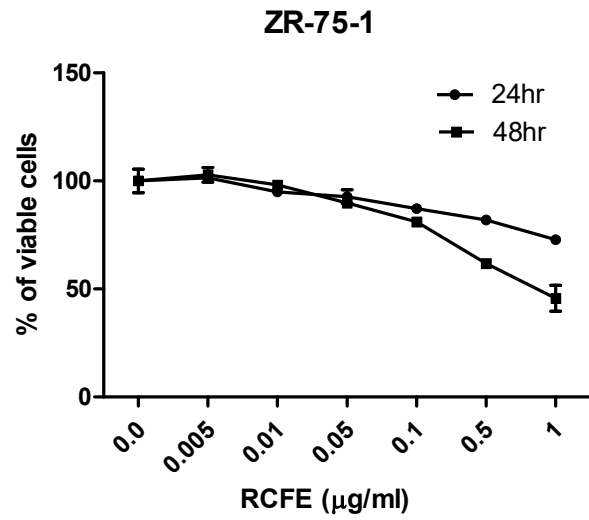

(C)

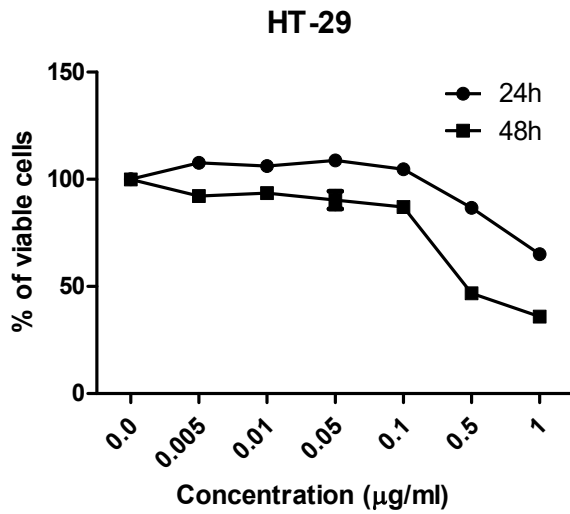

(D)

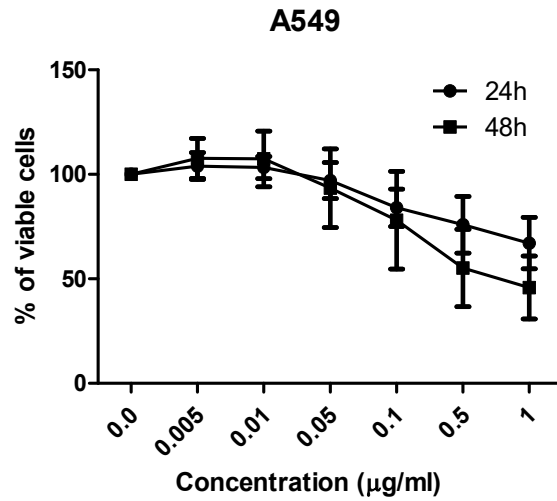

(E)

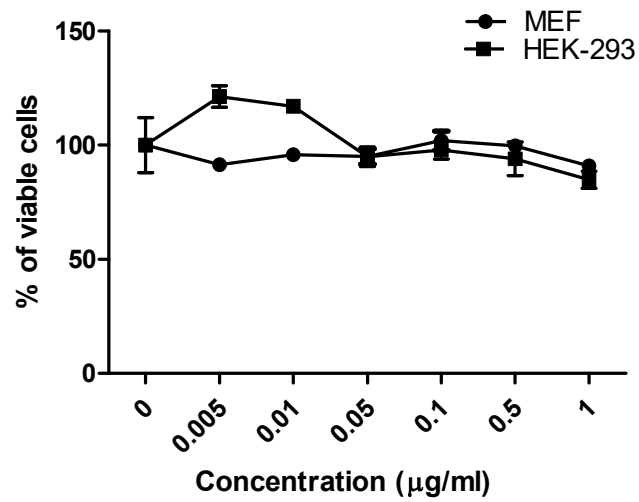

**Figure S1. RCFE induced cytotoxicity in several cancer cell lines.** Cytotoxicity assay performed with (A) MDA-MB-453 (B) ZR-75-1 (C) HT-29 and (D) A549 cells treated with various concentrations of RCFE for 24 and 48hr. Treatment of HEK-293 and MEF cells with various concentration of RCFE for 24 h (E). Data represent the mean  $\pm$  SEM of three independent experiments.

**Figure S2:**

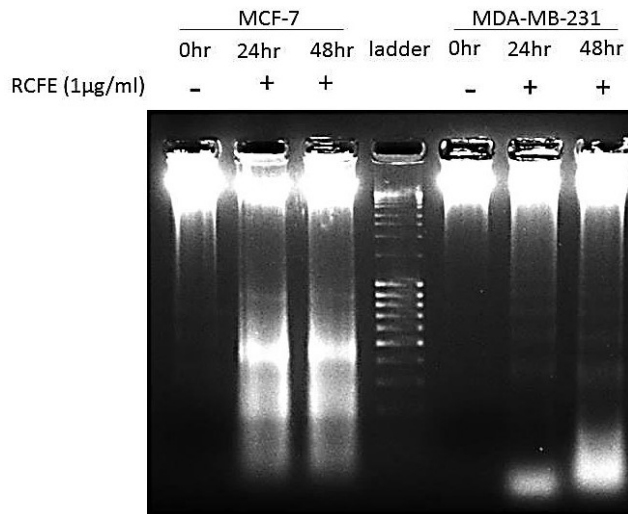

**Figure S2. RCFE induced DNA fragmentation in MCF-7 and MDA-MB-231 cells.** Genomic DNA isolated from MCF-7 and MDA-MB-231 cells treated with RCFE (1 $\mu$ g/ml) for 24 and 48hr.

**Figure S3:**

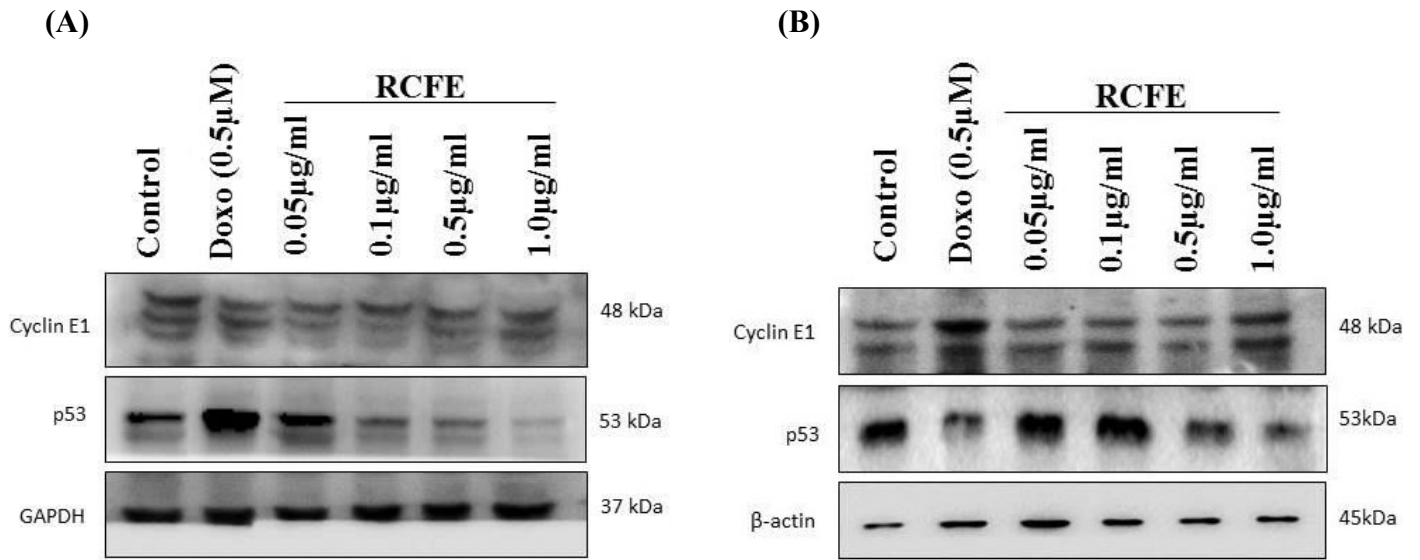

**Figure S3. Effect of RCFE on Cyclin E1 and p53 expression. (A)** MCF-7 and **(B)** MDA-MB-231 cells were treated with various concentrations of RCFE and expression of Cyclin E1 and p53 were studied using western blots.

Figure S4:

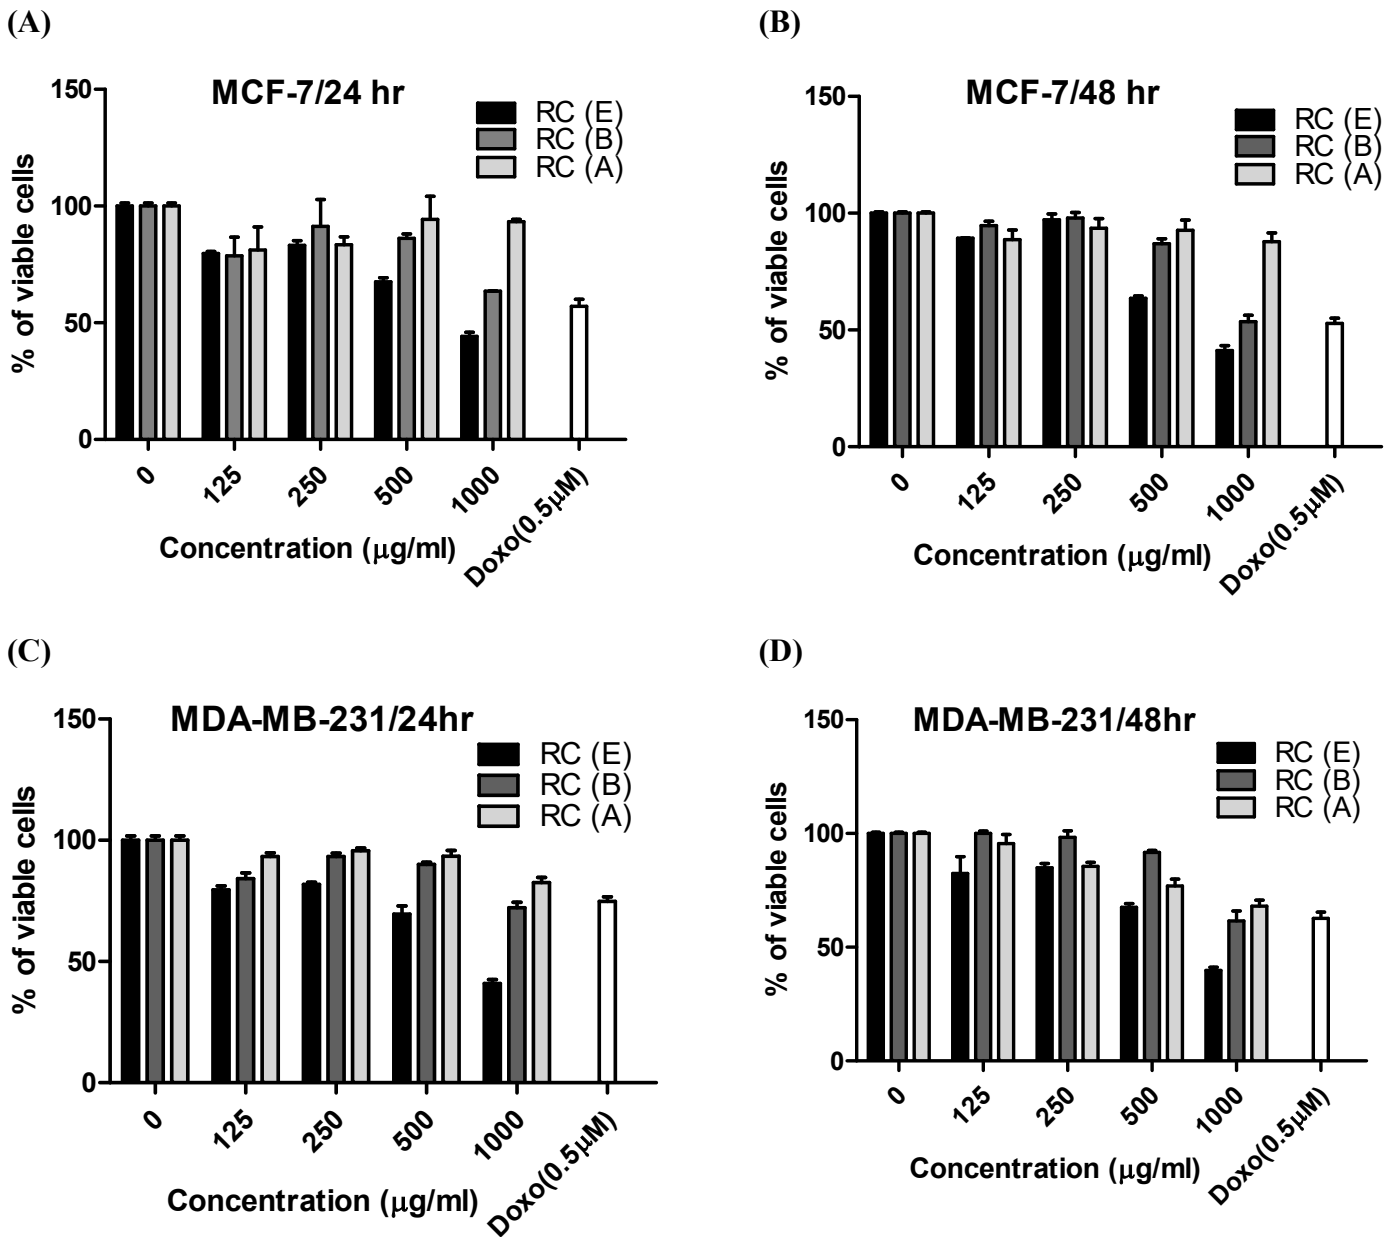

Figure S4. Cytotoxic effect of various fractions of RCFE on human breast cancer cells. Cytotoxic effect on MCF-7 and MDA-MB-231 cells were studied after treatment with three different fractions RC(E) (Ethyl acetate fraction), RC(B) (n-Butanol fraction) and RC(A) (Aqueous fraction) of RCFE for 24 and 48hr. Figure (A) and (B) represented data of MCF-7 and figure (C) and (D) represented data of MDA-MB-231 after treatment with each fraction for 24 and 48hr, respectively. Data represent the mean ± SEM of three independent experiments.

**Figure S5:**

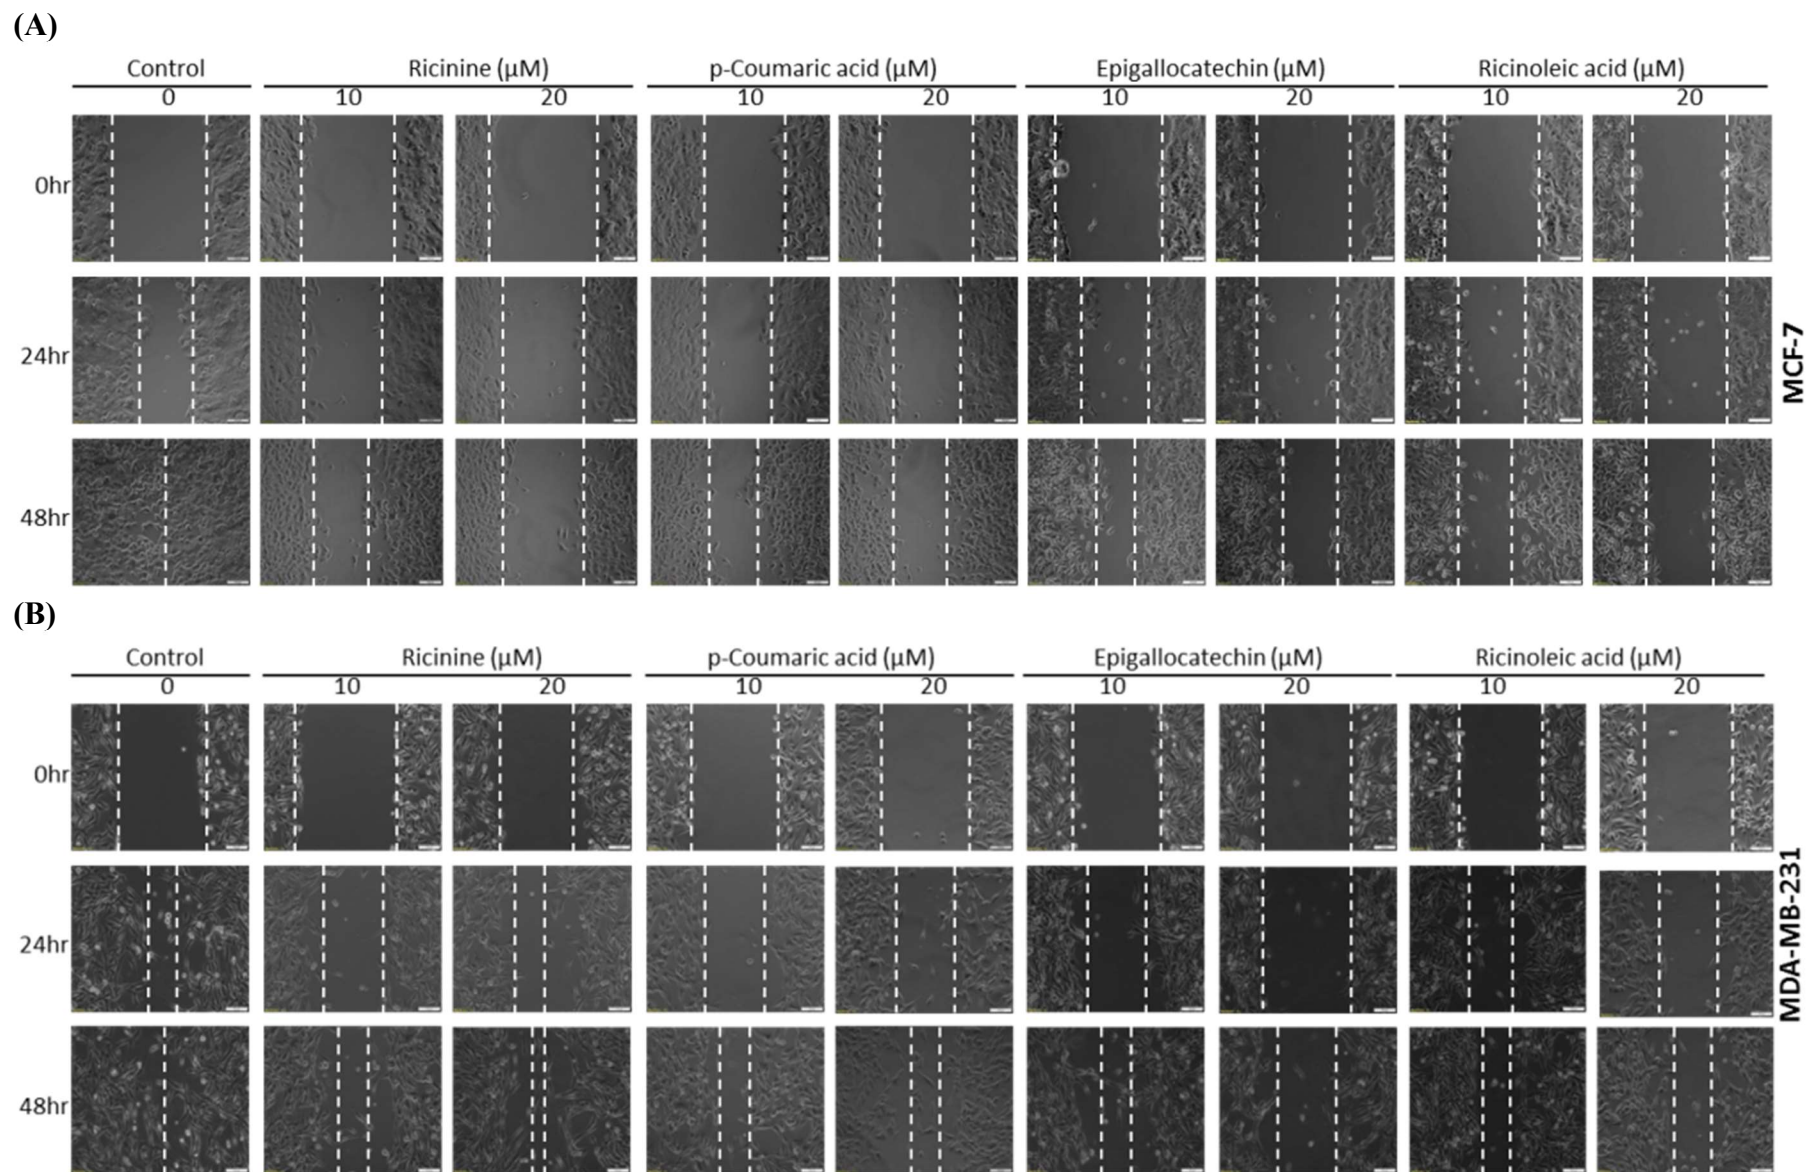

**Figure S5. Pure compounds identified from active fraction of RCFE showed inhibition of migration of MCF-7 and MDA-MB-231 cells. Effect of the four compounds Ricinine, p-Coumaric acid, Epigallocatechin and Ricinoleic acid at concentrations of 10 and 20 $\mu\text{M}$  on migration of MCF-7 and MDA-MB-231 cells are shown by wound healing assay in MCF-7 (A) and MBA-MB-231(B).**

**Figure S6:**

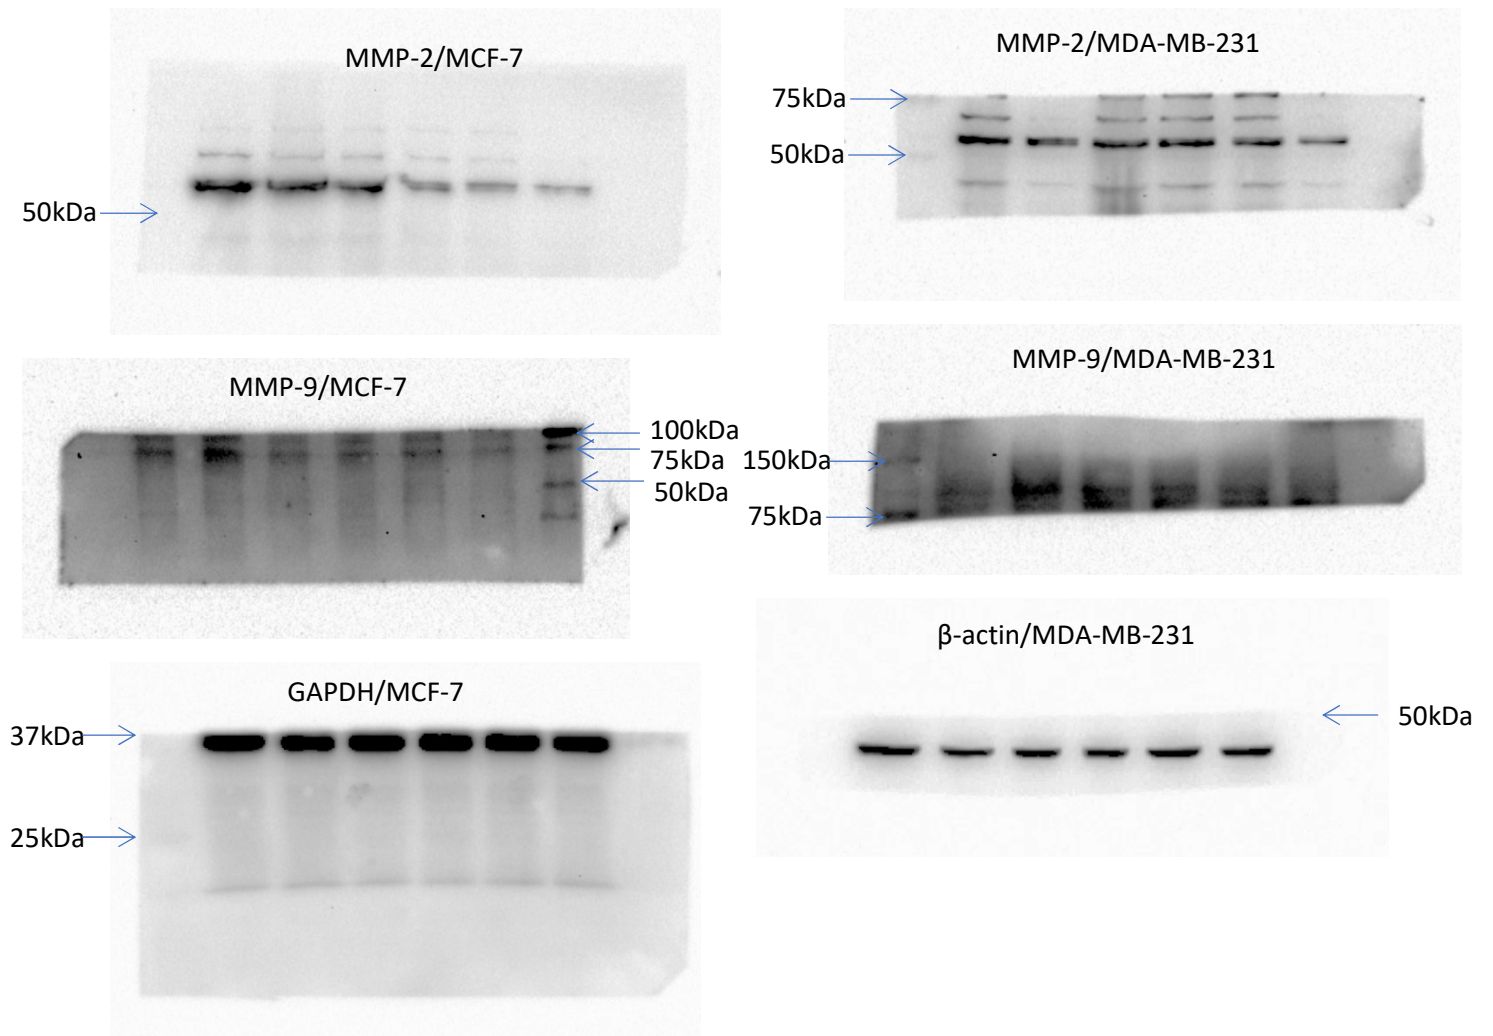

**Figure S6: Full-length blots for Figure 2**



**Figure S7:**

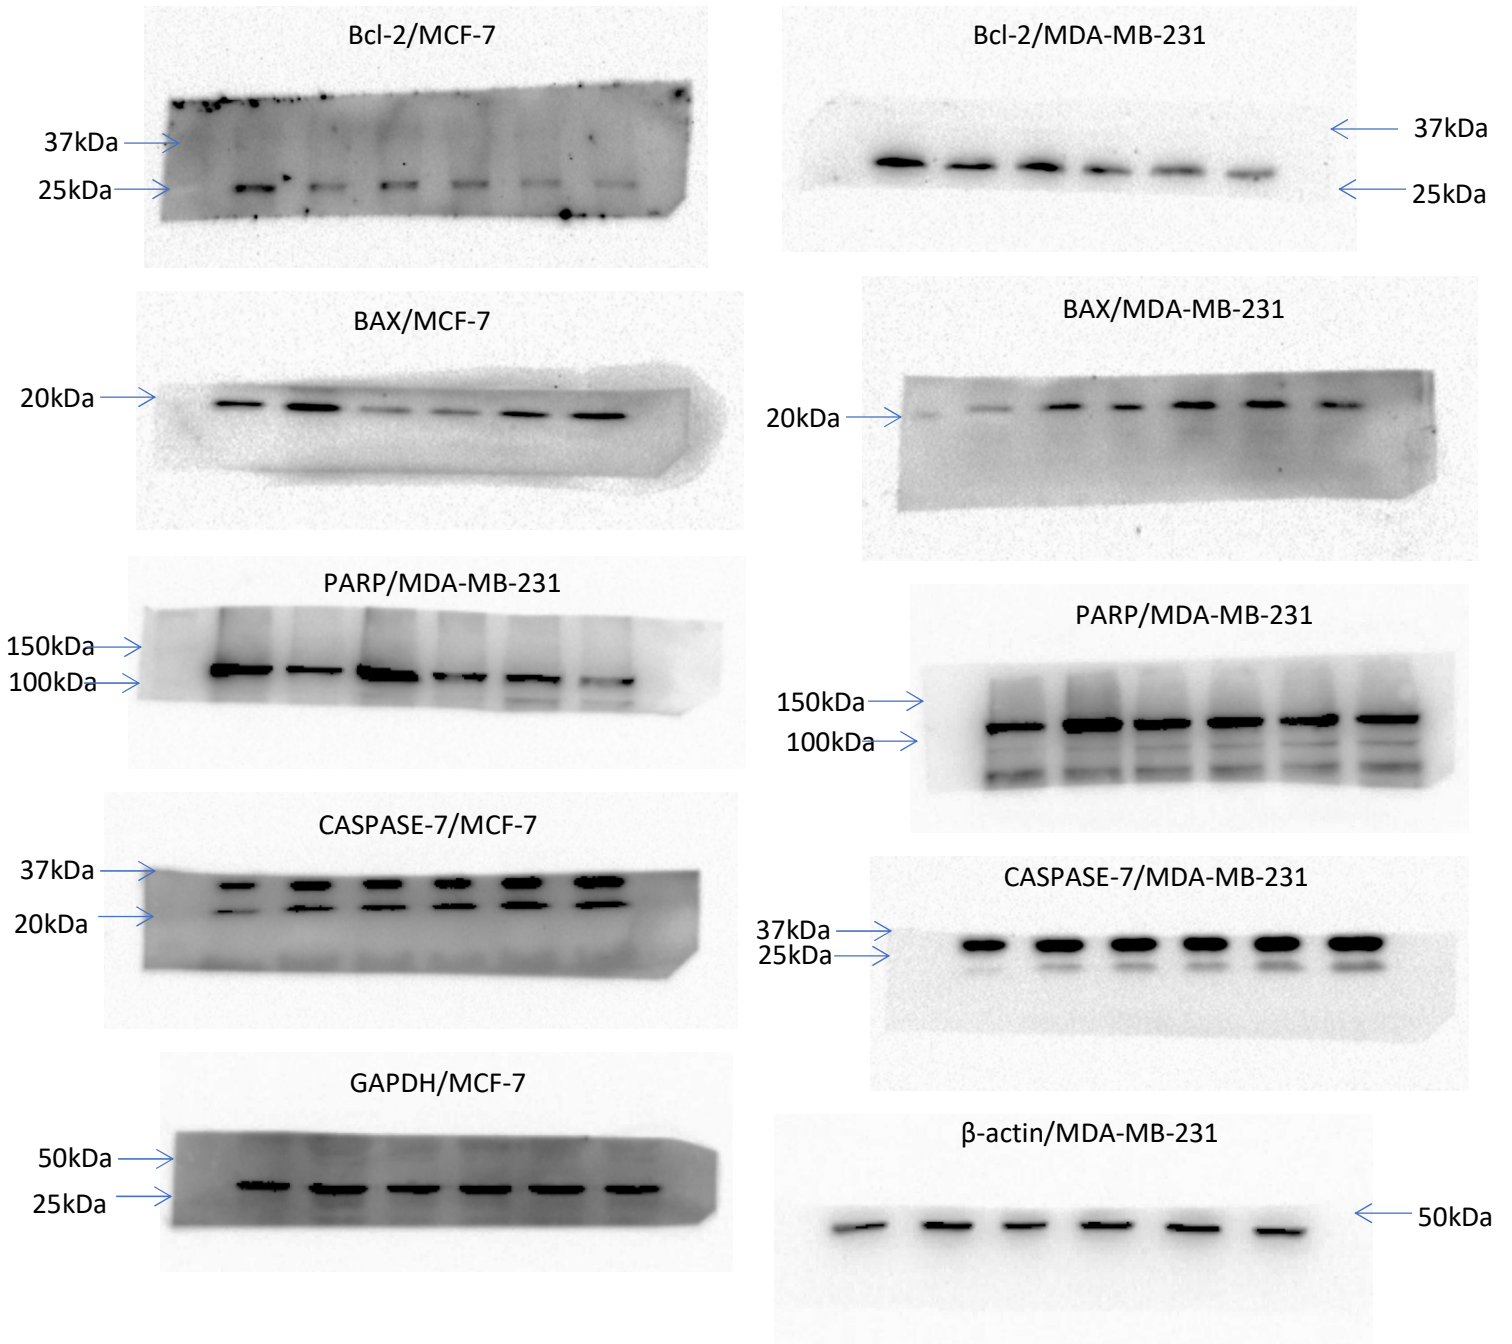

**Figure S7: Full-length blots for Figure 3**

**Figure S8:**

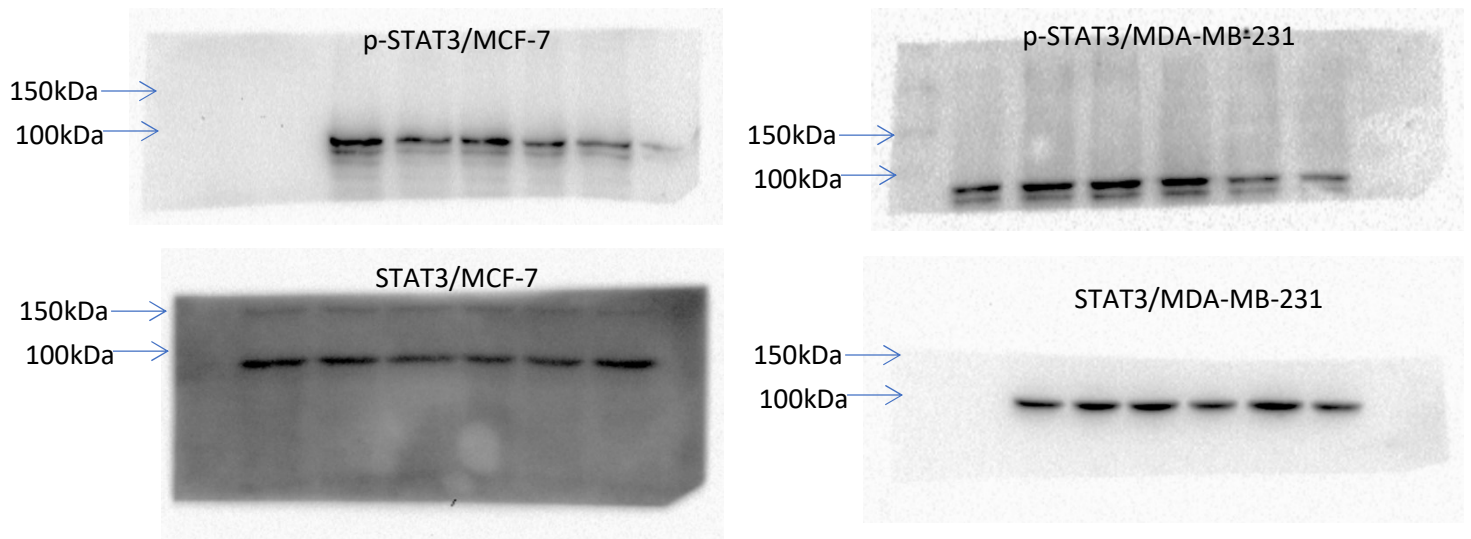

**Figure S8: Full-length blots for Figure 4**

**Figure S9:**

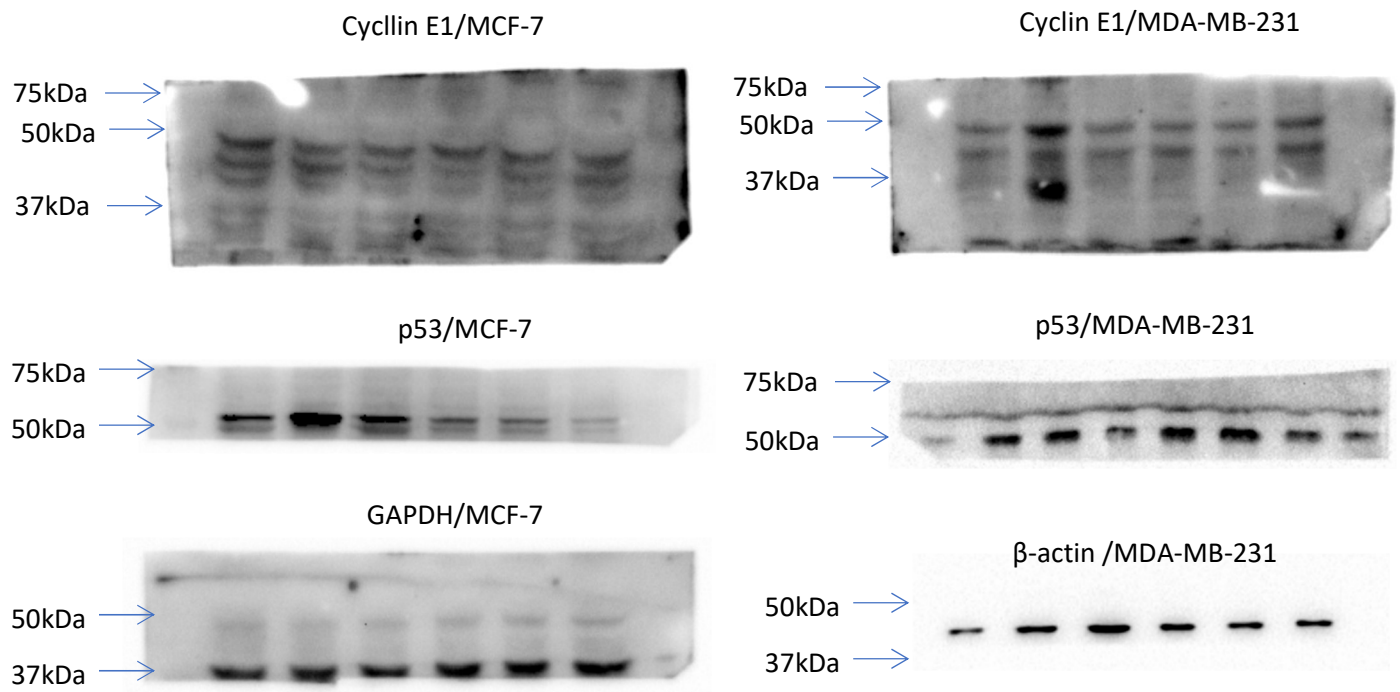

**Figure S9: Full-length blots for Figure S3**
